# Supplementary material
Source: PubMed Central journal article supplement (PMC3741427)
Supplement: Supp_Fig1.pdf [file Supp_Fig1.pdf]

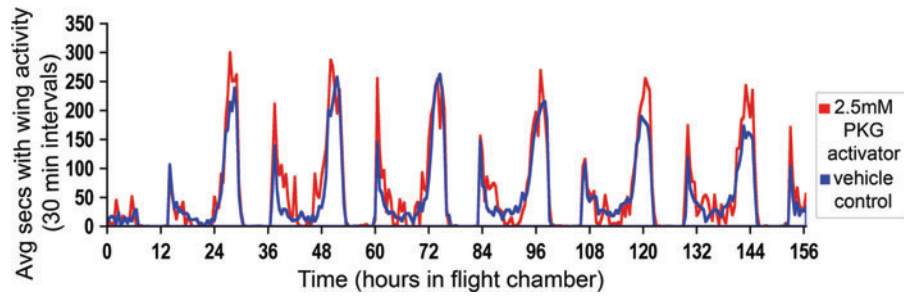

**SUPPLEMENTARY FIG. S1.** *Aedes* mosquitoes treated with protein kinase G (PKG) activator shows increased peaks of flight activity in morning and evening (run 2, with 2.5 mM PKG activator).
