# Supplementary material
Source: PubMed Central journal article supplement (PMC3741427)
Supplement: Supp_Fig2.pdf [file Supp_Fig2.pdf]

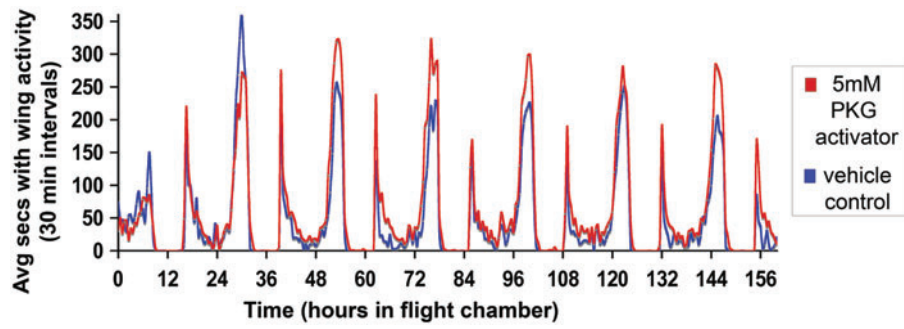

**SUPPLEMENTARY FIG. S2.** *Aedes* mosquitoes treated with protein kinase G (PKG) activator shows increased peaks of flight activity in morning and evening (run 3, with 5mM PKG activator).
